# Supplementary material for: Coral-Derived Endophytic Fungal Product, Butyrolactone-I, Alleviates Lps Induced Intestinal Epithelial Cell Inflammatory Response Through TLR4/NF-κB and MAPK Signaling Pathways: An in vitro and in vivo Studies
Source: Front Nutr. 2021 Oct 1;8:748118. doi: 10.3389/fnut.2021.748118 (PMC8517189; doi:10.3389/fnut.2021.748118)
Supplement: Supplementary file 6 [file Data_Sheet_5.ZIP]

Archive with 5 entries (4 files):
- fig6-wb/actin.tif
- fig6-wb/c1-23.tif
- fig6-wb/occ.tif
- fig6-wb/zo-1-4.tif
- fig6-wb/
